# Supplementary material for: The preventive effect of Chinese sumac fruit against monosodium urate-induced gouty arthritis in rats by regulating several inflammatory pathways
Source: Royal Society of Chemistry journal article supplement (doi:10.1039/d2fo02860c), 2022-12-09

## SUPPORTING INFORMATION

**The preventive effect of Chinese sumac fruits against monosodium urate-induced  
gouty arthritis in rats through regulating several inflammatory pathways**

Nan Ma, **Yuanyue Zhang, Tao Wang**, Yilin Sun, Shengbao Cai\*

Faculty of Food Science and Engineering, Kunming University of Science and  
Technology, Kunming, Yunnan Province, People's Republic of China, 650500

**\* Corresponding authors and proofs:**

Shengbao Cai

E-mail address: caikmust2013@kmust.edu.cn or caikmust2013@163.com

## **Characterization of the major bioactive compounds in the ethanol extract of Chinese sumac fruits**

The major bioactive compounds in the ethanol extract of Chinese sumac fruits were firstly separated by using a Thermo Fisher Ultimate 3000 UHPLC System (Thermo Fisher Scientific, Germany) with an Agilent Zorbax SB-C18 column (1.7  $\mu\text{m}$ , 2.1 mm  $\times$  100 mm), and then characterized by a Q-Exactive Orbitrap mass spectrometer (Thermo Fisher Scientific, Bremen, Germany) in the negative mode. The HPLC parameters were as follows: mobile phases, 0.1% formic acid in water (A) and acetonitrile (B); flow rate, 0.1 mL/min; elution procedure, 0–2min, 5% B; 2–8 min, 5%–30% B; 8–12 min, 30%–50% B; 12–18 min, 50%; 18–20 min, 50%–5%; 20–22 min, 5%; column temperature, 30°C; volume of sample injection, 2.0  $\mu\text{L}$ . Mass parameters were set as follows: full MS scan range, 50–1000 m/z; auxiliary gas flow, 9 L/min; sheath gas flow rate, 33 L/min; sweep gas, 4 L/min; S-lens RF level, 50%; spray voltage, 3.3 kV, capillary temperature, 330 °C; heater temperature, 360 °C.

**Fig. S1** Chromatogram of ethanol extract from Chinese sumac fruits. Peak identification and their MS data are shown in Table S1.

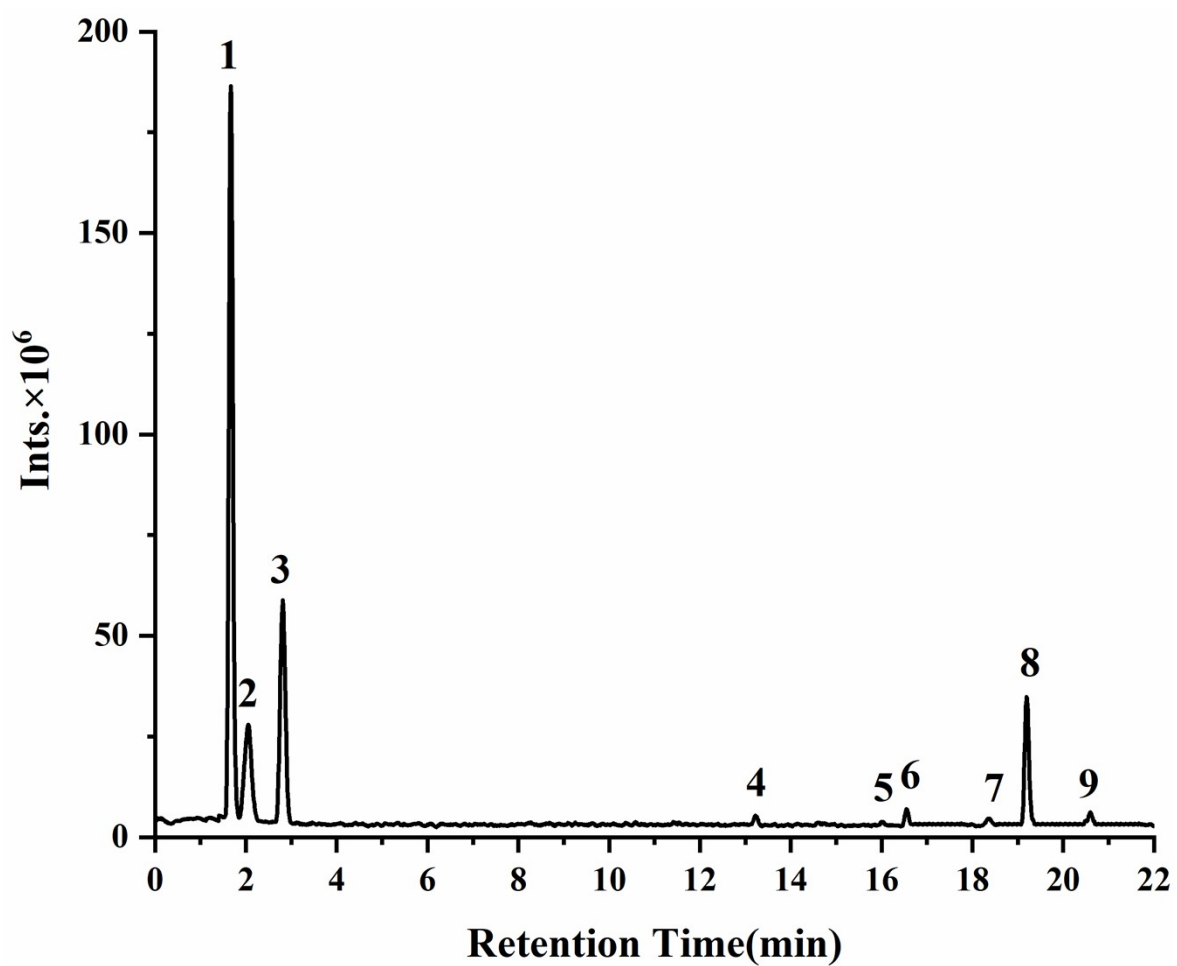

**Table S1** Phytochemical identification of the ethanol extract from Chinese sumac fruits by UHPLC-ESI-HRMS/MS

| Peak No. | Compounds                         | RT (min) | Molecular formula                               | [M-H] <sup>-</sup> (m/z) | MS/MS ion fragments           | µg/g of dry extract | Average percentage (% Total identified phenolic content) |
|----------|-----------------------------------|----------|-------------------------------------------------|--------------------------|-------------------------------|---------------------|----------------------------------------------------------|
| 1        | Malic acid                        | 1.35     | C <sub>4</sub> H <sub>6</sub> O <sub>5</sub>    | 133.0131                 | 71.0123(100),72.9919(21.47)   | ---                 | ---                                                      |
| 2        | Citric acid                       | 1.77     | C <sub>6</sub> H <sub>8</sub> O <sub>7</sub>    | 191.019                  | 87.0073(100),57.0332(69.97)   | ---                 | ---                                                      |
| 3        | Gallic acid                       | 2.67     | C <sub>7</sub> H <sub>6</sub> O <sub>5</sub>    | 169.0134                 | 69.0332(100),124.0153(68.27)  | 6093.66±331.17      | 66.08                                                    |
| 4        | Trigalloyl glucose                | 13.23    | C <sub>27</sub> H <sub>24</sub> O <sub>18</sub> | 635.0901                 | 169.0132(100),168.0054(8.65)  | 343.30±11.74        | 3.72                                                     |
| 5        | Myricetin-3- <i>O</i> -rhamnoside | 16.05    | C <sub>21</sub> H <sub>20</sub> O <sub>12</sub> | 463.0889                 | 316.0223(100),317.0275(29.81) | 143.53±16.45        | 1.56                                                     |
| 6        | Luteolin-7- <i>O</i> -glucoside   | 16.55    | C <sub>21</sub> H <sub>20</sub> O <sub>11</sub> | 447.0938                 | 146.9601(10),61.9870(81.04)   | 944.05±49.25        | 10.24                                                    |
| 7        | Myricetin- <i>O</i> -gallate      | 18.37    | C <sub>28</sub> H <sub>24</sub> O <sub>16</sub> | 615.1002                 | 151.0061(100),137.0234(47.52) | 223.17±8.57         | 2.42                                                     |
| 8        | Quercetin-3- <i>O</i> -rhamnoside | 19.20    | C <sub>21</sub> H <sub>20</sub> O <sub>11</sub> | 447.0937                 | 300.0274(100),301.0339(56.12) | 1380.79±64.72       | 14.97                                                    |
| 9        | Kaempferol-3- <i>O</i> -hexoside  | 20.60    | C <sub>21</sub> H <sub>20</sub> O <sub>10</sub> | 431.0987                 | 61.9870(100),130.9827(38.09)  | 92.52±6.34          | 1.01                                                     |

RT: retention time; Values are expressed as the mean ± S.D. ( $n = 3$ , µg/g of dry extract); Gallic acid standard was used for quantifying the compounds 3,4; myricetin-3-*O*-rhamnoside standard was used for quantifying the compounds 5 and 7; luteolin-7-*O*-glucoside standard was used for quantifying the compound 6; quercetin-3-*O*-rhamnoside standard was used for quantifying the compounds 8; kaempferol standard was used for quantifying the compounds 9.

**Fig. S2** Effects of the extract from Chinese sumac fruits on wight body (A) and food intake (B) of gout rats.

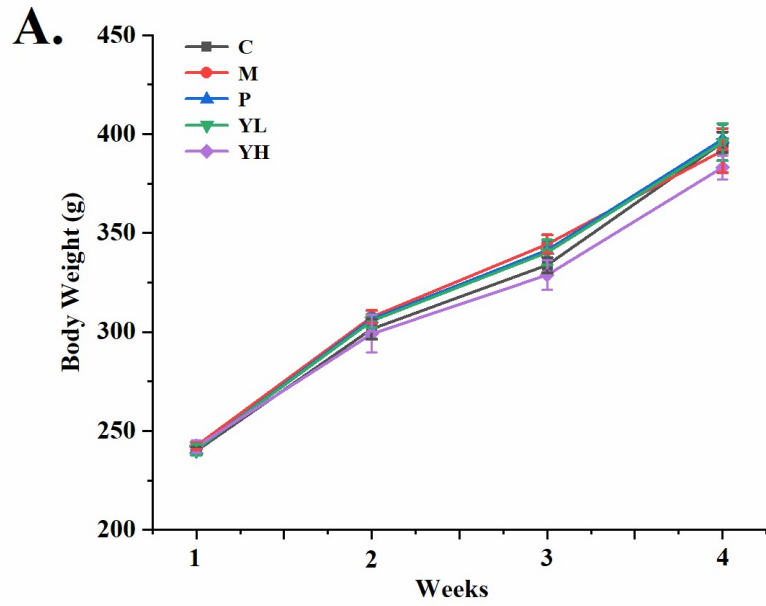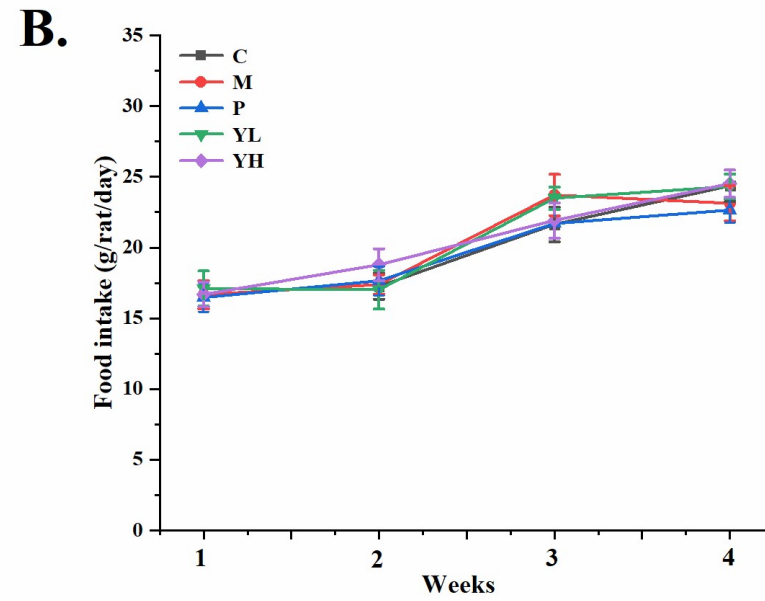

Raw images of western blot in Figure 5

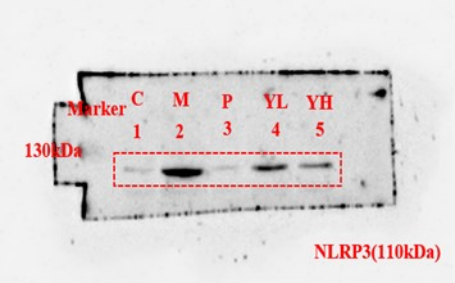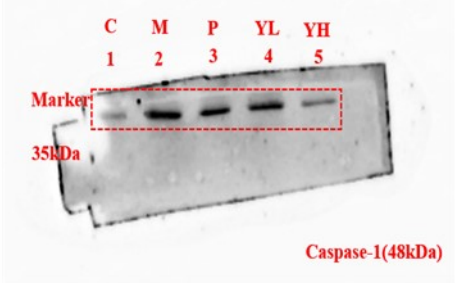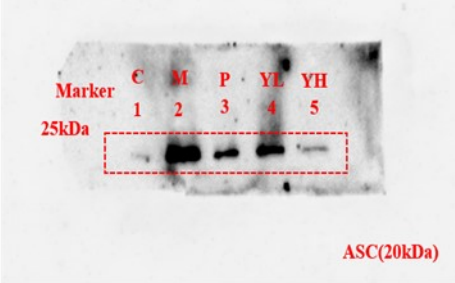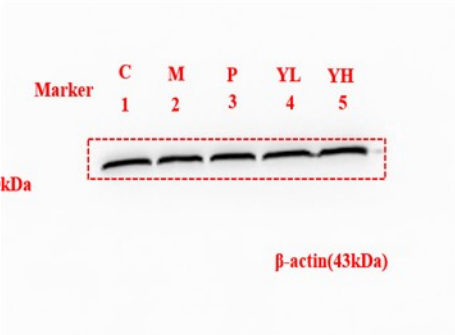

Raw images of western blot in Figure 6

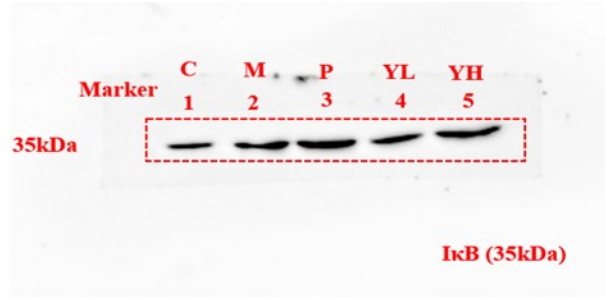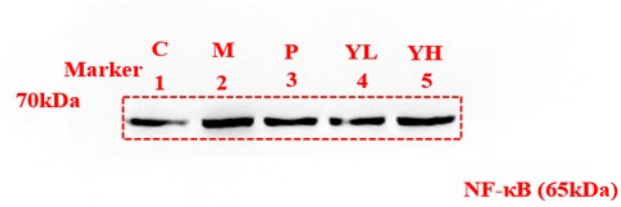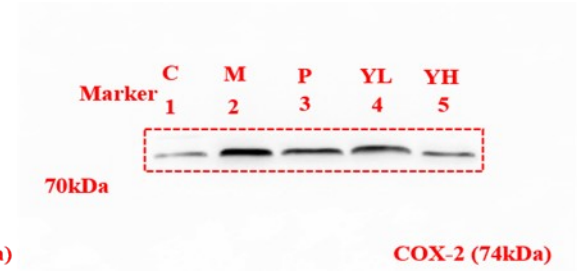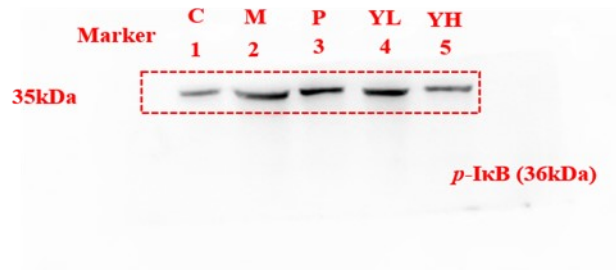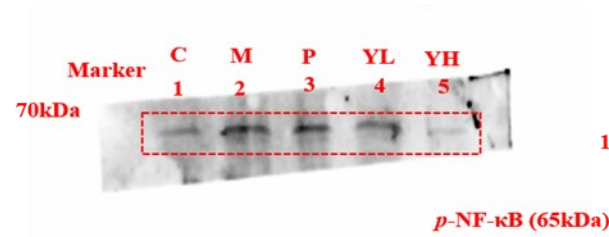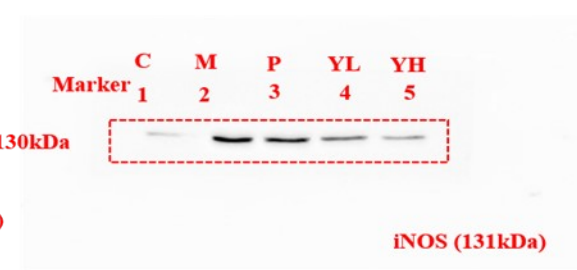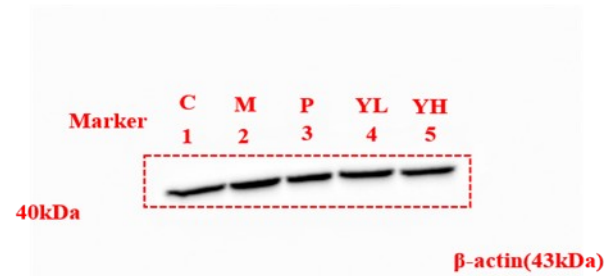

Raw images of western blot in Figure 8

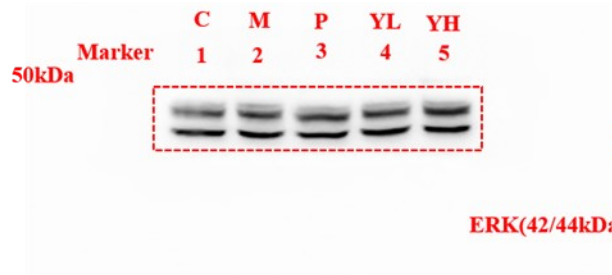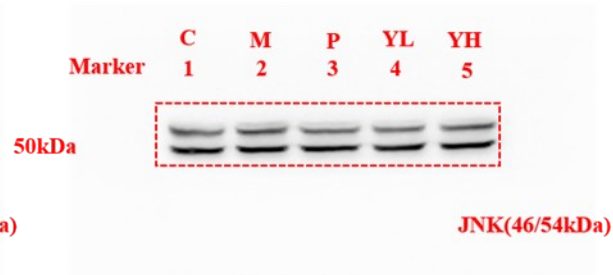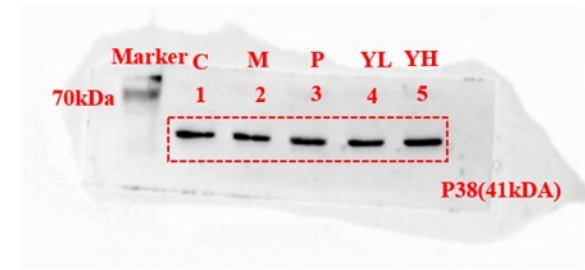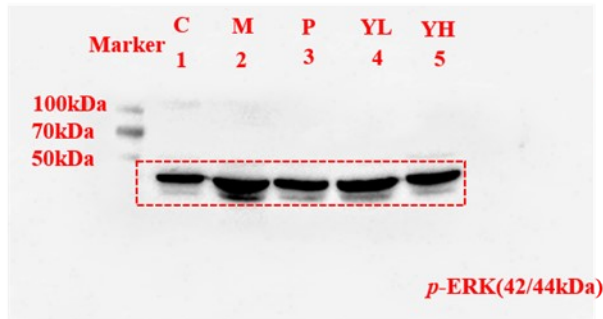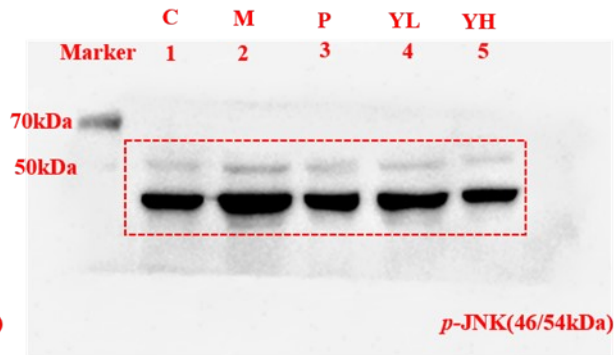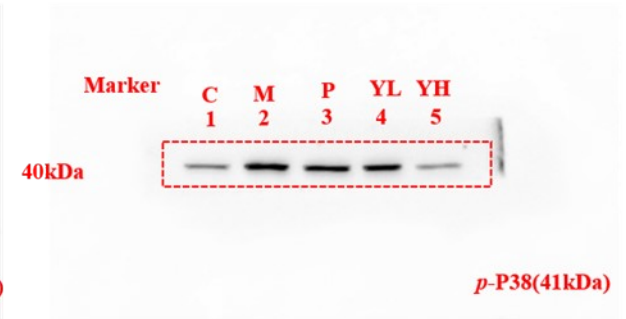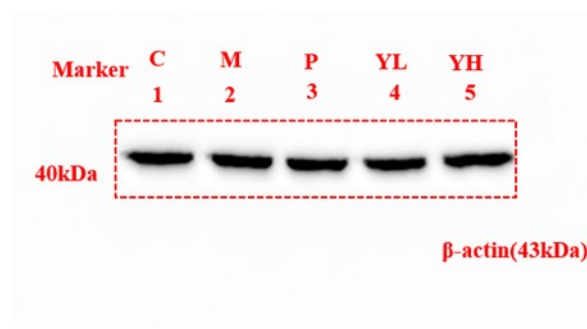

Supplement: d2fo02860c1.pdf [file d2fo02860c1.pdf]
